# Supplementary material for: Isoform-specific AMPK association with TBC1D1 is reduced by a mutation associated with severe obesity
Source: PubMed Central journal article supplement (PMC6156765; doi:10.1042/bcj20180475), 2018-09-25

## SUPPLEMENTARY DATA

### Figure S1. Reciprocal binding of TBC1D1 to immunoprecipitated AMPK- $\alpha$ 1.

Western blot analysis of Flp-In HEK293 cells expressing FLAG-tagged AMPK- $\alpha$ 1 and indicated GFP-tagged proteins immunoprecipitated with a FLAG antibody. Representative of 2 independent experiments.

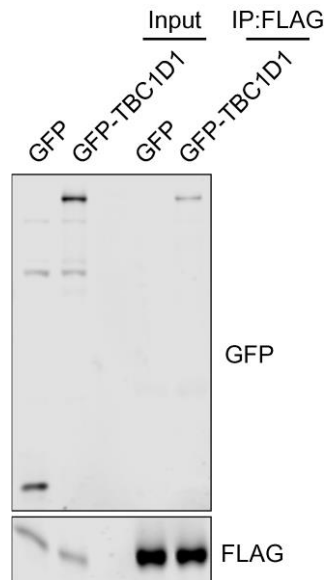

**Figure S2. Reciprocal binding of endogenous TBC1D1 to endogenous AMPK- $\alpha$ 1.** (A) Lysates from differentiated C2C12 myotubes serum starved for 4-5 h prior to addition of vehicle or AICAR (2 mM, 2 h) were immunoprecipitated with the AMPK- $\alpha$ 1 isoform specific antibody or IgG control and washed complexes analysed for the presence of endogenous TBC1D1. (B) Quantitation of data in A, normalised to AMPK- $\alpha$  pull-down and expressed in terms of basal. Mean  $\pm$  SEM; 3 independent experiments; two-tailed t-test **\*\*p<0.01.**

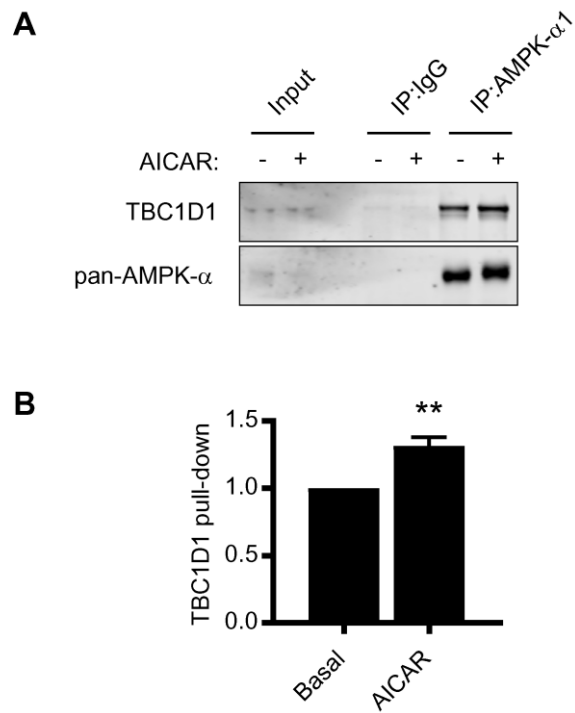

**Figure S3. AMPK- $\alpha$ 1 binding to TBC1D1 is partially dependent on the presence of an intact AMPK consensus motif.** (A) AMPK substrate consensus motif sequence aligned with the TBC1D1 sequence surrounding Ser<sup>237</sup>. Hydrophobic residues are indicated by  $\Phi$  and basic residues are shown as  $\beta$ . (B) Quantification of western blot analysis of GFP trap precipitates from Flp-In HEK293 cells stably expressing FLAG-AMPK- $\alpha$ 1 transiently expressing full-length GFP-TBC1D1 with the indicated mutations. Cells were serum starved for 4-5 h prior to addition of STO-609 (25  $\mu$ M, 30 min) followed by treatment with either vehicle or A769662 (25  $\mu$ M) for 30 min. Samples were normalised to GFP-TBC1D1 precipitated and expressed in terms of the WT basal condition. Mean  $\pm$  SEM; 4 independent experiments; one-way ANOVA Dunnett's post-test \*  $p < 0.05$  \*\* $p < 0.01$ , \*\*\* $p < 0.001$  cf WT with A769662.

**A**

Consensus: X $\Phi$ XX $\Phi$ XXX $\Phi$ XX $\beta$  $\Phi$  $\beta$ XXXSXXX $\Phi$   
TBC1D1: APTGSQEPVRRP**MRKSFS**Q**PGL**  
220 241

**B**

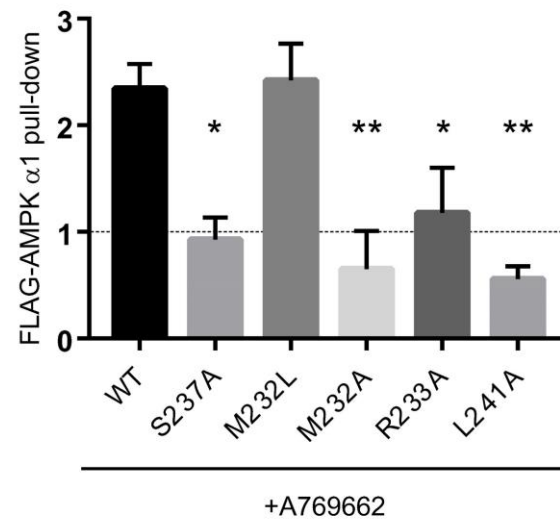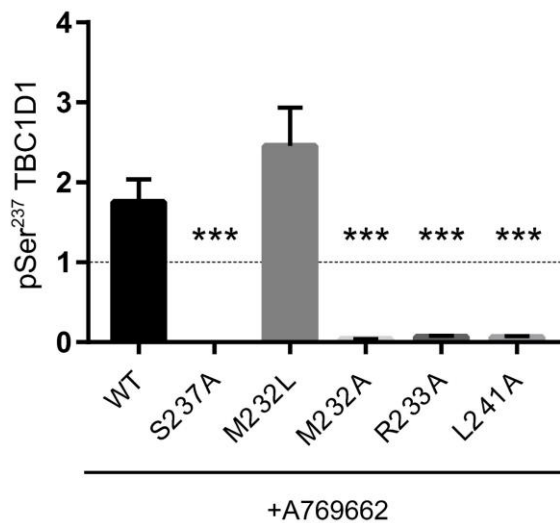

**Figure S4. Kinase dead AMPK- $\alpha$ 1 has enhanced binding to TBC1D1.** (A) Expression of proteins as validation of CRISPR/Cas9  $\alpha$ 1/ $\alpha$ 2 double knockout (DKO) compared to wild-type Flp-In HEK293 cells (WT). (B) Validation of AMPK activity in basal or A769662 (25  $\mu$ M, 30 min) treated CRISPR/Cas9  $\alpha$ 1/ $\alpha$ 2 double knockout (DKO) HEK293 cells stably expressing either WT or Kinase Dead (KD) FLAG-AMPK- $\alpha$ 1. (C) Immobilised GST-His or GST-PTB1+2-His proteins were incubated with lysis buffer only (-) or lysates from DKO HEK293 cells stably expressing either WT or K D FLAG-AMPK- $\alpha$ 1 and washed complexes analysed. (D) Quantitation of data in C, normalised to GST-PTB1+2 and expressed in terms of the WT condition. Mean  $\pm$  SEM; 4 independent experiments; two-tailed t-test \*\*\*\* $p$ <0.0001.

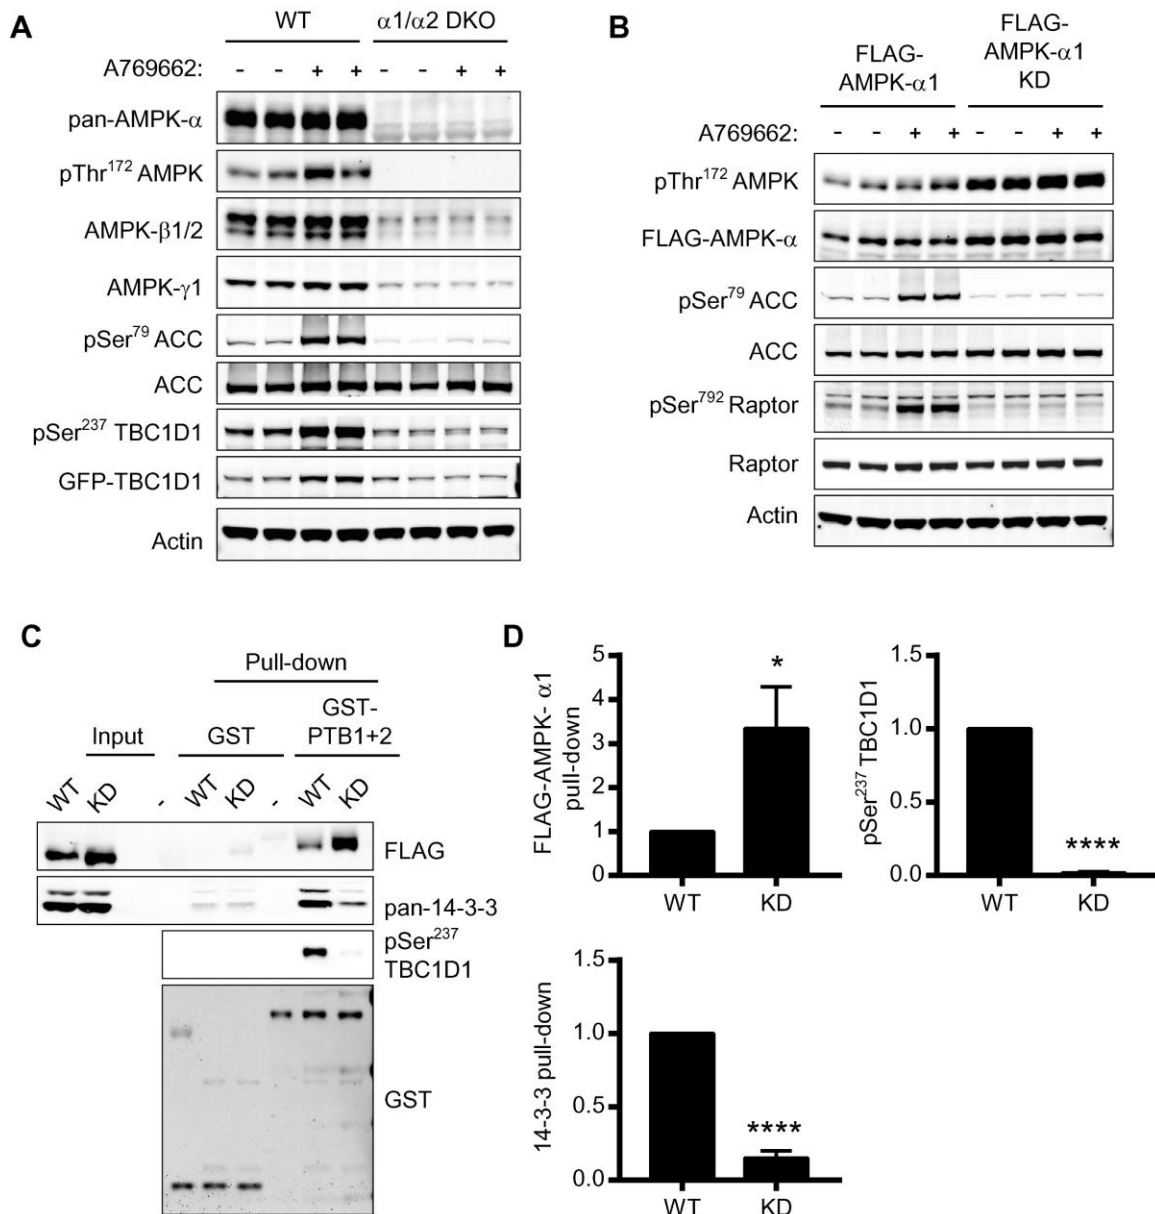

**Figure S5. Ser<sup>237</sup> phosphorylation of R125W mutant in FLAG-AMPK- $\alpha$ 2 cells.** (A) Quantitative fluorescence-based Western blot analysis of phosphorylation of TBC1D1, AMPK and ACC and total proteins from Flp-In HEK293 cells stably expressing FLAG-AMPK- $\alpha$ 2 and transiently expressing either GFP-TBC1D1 or GFP-TBC1D1 R125W. Cells had been serum starved (4-5 h) prior to addition of STO-609 (25  $\mu$ M, 30 min) and subsequent treatment with either vehicle or A769662 (25  $\mu$ M) for the times indicated. (B) Quantitation of data shown in A in GFP-TBC1D1 (black circles) and GFP-TBC1D1 R125W (white diamonds) expressing cells; Ser<sup>237</sup> phosphorylation normalized to GFP-tagged protein expression; AMPK phosphorylation normalized to FLAG-AMPK- $\alpha$ 1 expression; ACC phosphorylation normalized to total ACC expression. All displayed as a fold over basal phosphorylation. Mean  $\pm$  SEM; 4 independent experiments.

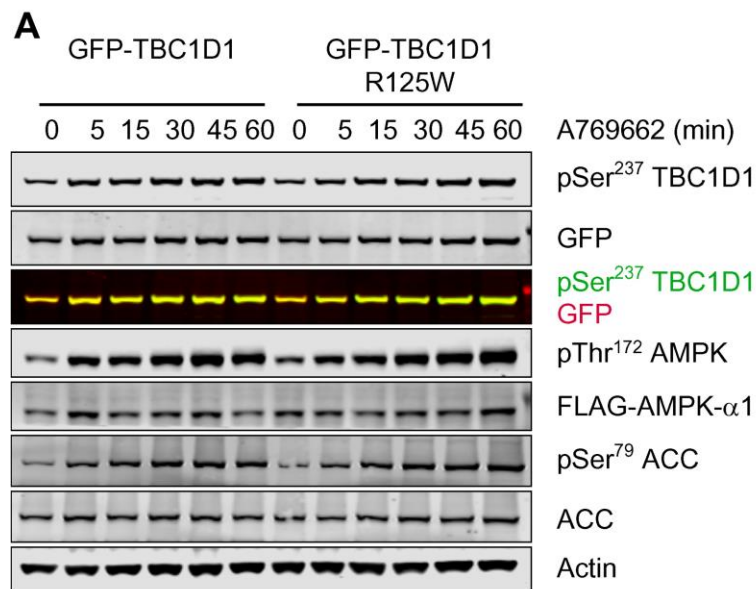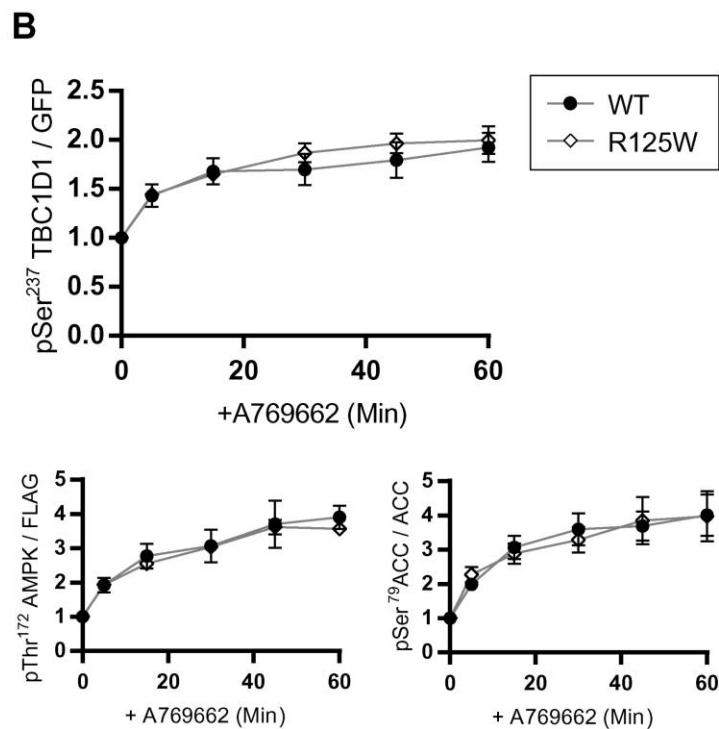

Supplement: BCJ-475-2969-s1.pdf [file BCJ-475-2969-s1.pdf]
